# Supplementary material
Source: PubMed Central journal article supplement (PMC2679486)
Supplement: M808084200_1.pdf [file M808084200_1.pdf]

**Table 1: The sequence of the PCR primers used for construction of various deletion mutations of INrf2 and cloning of PTM  $\alpha$  into pcDNA3.1 V5.**

| Name of Constructs                                    | Sequence of the PCR primers used                                                                                                                                                                              | Templet DNA used                   |
|-------------------------------------------------------|---------------------------------------------------------------------------------------------------------------------------------------------------------------------------------------------------------------|------------------------------------|
| <b>2XGFP</b>                                          | Forward: 5'-CGCGTTCGACATGGTGAGCAAGGGCGAGGAG-3'<br>Reverse: 5'-CGCGGATCCCCCTTGTACAGCTCGTCCATGCC-3'                                                                                                             | pEGFP-N1 vector                    |
| <b>INrf2-2XGFP</b>                                    | Forward: 5'-CCGCTCGAGCCACCATGCAGCCCCGAACCCAAGCTTAG-3'<br>Reverse: 5'-CGCGGATCCCCGCAGGTACAGTTTTGTTGATC-3'                                                                                                      | Mouse pcDNAINrf2                   |
| <b>DGR-2XGFP</b>                                      | Forward: 5'-CCGCTCGAGCCACCATGCAGGCAGTGCCCTGCCGCGCG3'<br>Reverse: 5'-CCGGAATTCGATGTCATGCGGGTCACCTCACTC-3'                                                                                                      | Mouse pcDNAINrf2                   |
| <b>INrf2- GFP</b>                                     | Forward: 5'-CCGCTCGAGCCACCATGCAGCCCCGAACCCAAGCTTAG-3'<br>Reverse: 5'-CGCGGATCCCCGCAGGTACAGTTTTGTTGATC-3'                                                                                                      | Mouse pcDNAINrf2                   |
| <b><math>\Delta</math>NR INrf2-GFP</b>                | Forward: 5'-CCGCTCGAGCCACCATGAAGCAGGCTTTTGGCGTCATG-3'<br>Reverse: 5'-CGCGGATCCCCGCAGGTACAGTTTTGTTGATC-3'                                                                                                      | Mouse pcDNAINrf2                   |
| <b>INrf2-<math>\Delta</math>BTB-GFP</b>               | Forward: 5'-CCGCTCGAGCCACCATGCAGCCCCGAACCCAAGCTTAG-3'<br>Reverse: 5'-CCGGAATTCGAGGTGTGATCCTCTAGTGTGTAG-3'<br>Forward: 5'-CCGGAATTCTGACCCAGCAACGCCATTGGC-3'<br>Reverse: 5'-CGCGGATCCCCGCAGGTACAGTTTTGTTGATC-3' | Mouse pcDNAINrf2                   |
| <b>INrf2-<math>\Delta</math>IVR-GFP</b>               | Forward: 5'-CCGCTCGAGCCACCATGCAGCCCCGAACCCAAGCTTAG-3'<br>Reverse: 5'-CCGGAATTCGACAGCTGCTGCACGAGGAAGTC-3'<br>Forward: 5'-CCGGAATTCTCAGGCAGTGCCCTGCCGCGCG-3'<br>Reverse: 5'-CGCGGATCCCCGCAGGTACAGTTTTGTTGATC-3' | Mouse pcDNAINrf2                   |
| <b>INrf2-<math>\Delta</math>DGR-GFP</b>               | Forward: 5'-CCGCTCGAGCCACCATGCAGCCCCGAACCCAAGCTTAG-3'<br>Reverse: 5'-CCGGAATTCGACACTGCCTGCGTGGGCTTGTG-3'<br>Forward: 5'-CCGGAATTCTTCTGGCCGAGCGGGGTGGGTG-3'<br>Reverse: 5'-CCGGAATTCTTCTGGCCGAGCGGGGTGGGTG-3'  | Mouse pcDNAINrf2                   |
| <b>INrf2-<math>\Delta</math>CTR-GFP</b>               | Forward: 5'-CCGCTCGAGCCACCATGCAGCCCCGAACCCAAGCTTAG-3'<br>Reverse: 5'-CGCGGATCCCCTGTCATGCGGGTCACCTCACTC-3'                                                                                                     | Mouse pcDNAINrf2                   |
| <b>INrf2-<math>\Delta</math>BTB-NES2-GFP</b>          | Forward: 5'-CTGGTGCAGATATTCCAGGAGGCCACGGCG 3'<br>Reverse: 5'-CTCCTG GAATATCTGCACCAGGTAGTCCTT3'                                                                                                                | Methylated INrf2- $\Delta$ BTB-GFP |
| <b>INrf2-<math>\Delta</math>DGR-NES2-GFP</b>          | Forward: 5'-CTGGTGCAGATATTCCAGGAGGCCACGGCG 3'<br>Reverse: 5'-CTCCTG GAATATCTGCACCAGGTAGTCCTT3'                                                                                                                | Methylated INrf2- $\Delta$ DGR-GFP |
| <b>INrf2-<math>\Delta</math>CTR-NES2-GFP</b>          | Forward: 5'-CTGGTGCAGATATTCCAGGAGGCCACGGCG 3'<br>Reverse: 5'-CTCCTG GAATATCTGCACCAGGTAGTCCTT3'                                                                                                                | Methylated INrf2- $\Delta$ CTR-GFP |
| <b>Flag-INrf2-pcDNA5/FRT/TO</b>                       | Forward: 5'-CATGGCCGGTACCACCGCCATGCAGCCCCGAACCCAAGC3'<br>Reverse: 5'-TGGCCAGGATCCGCAGGTACAGTTTTGTTGATCAATT3'                                                                                                  | Mouse pcDNAINrf2                   |
| <b>Flag-DGRINrf2-pcDNA5/FRT/TO</b>                    | Forward: 5'-CATGGCCGGTACCACCGCCATGCAGGCAGTGCCCTGCCGC<br>Reverse: 5'-CTGGCCAGGATCCCTGAGATGTCATGCGGGTCACCT3'                                                                                                    | Mouse pcDNAINrf2                   |
| <b>Flag-<math>\Delta</math>DGR-INrf2pcDNA5/FRT/TO</b> | Forward: 5'-CATGGCCGGTACCACCGCCATGCAGCCCCGAACCCAAGC3'<br>Reverse: 5'-TGGCCAGGATCCGCAGGTACAGTTTTGTTGATCAATT3'                                                                                                  | INrf2- $\Delta$ DGR-GFP            |
| <b>PTM<math>\alpha</math>-V5</b>                      | Forward: 5'-AACCCCATGTCAGACGCAGCCGTAGAC-3'<br>Reverse: 5'-GCTATCCTCGTCGGTCTTCTGCTTCTT-3'                                                                                                                      | PTM $\alpha$ cDNA                  |
